# Supplementary material for: Clinical Relevance of VEGFA (rs3025039) +936 C>T Polymorphism in Primary Myelofibrosis: Susceptibility, Clinical Co-Variates, and Outcomes
Source: MDPI journal article supplement (doi:10.3390/genes12081271), 2021-08-20
Supplement: s1 [file s1]

**Table S1.** Frequency of the genotypes and of the T-allele of the *VEGFA* rs3025039 polymorphism in subjects with primary myelofibrosis (PMF) stratified according to the somatic driver mutations

|                                                      | Numbers       | <i>VEGFA</i> rs3025039 genotype, N (% of PMF subjects) |               |              |               |               | Genotype frequencies                           |                                       | T-allele frequency           |                                       |                                                 |
|------------------------------------------------------|---------------|--------------------------------------------------------|---------------|--------------|---------------|---------------|------------------------------------------------|---------------------------------------|------------------------------|---------------------------------------|-------------------------------------------------|
|                                                      |               | CC                                                     | CT            | TT           | CC /CT        | CT/TT         | CT/TT vs. CC<br>OR (95% CI)                    | TT vs. CC/CT<br>OR (95% CI)           | T-allele<br>frequency<br>(%) | vs. total<br>PMF<br>population        | vs healthy<br>population                        |
| PMF, all<br>subjects                                 | 827           | 584                                                    | 219           | 24           | 803           | 243           |                                                |                                       | 267/1654<br>(16.1)           |                                       |                                                 |
| <i>JAK2</i> <sup>V617F</sup> -<br>positive, N<br>(%) | 544<br>(65.8) | 367<br>(62.8)                                          | 161<br>(73.5) | 16<br>(66.6) | 528<br>(65.7) | 177<br>(72.8) | <b>OR = 1.58<br/>(1.41-2.20)<br/>P = 0.006</b> | OR = 1.04<br>(0.44-2.46)<br>P = 0.92  | 193/1088<br>(17.7)           | OR = 1.12<br>(0.91, 1.37)<br>P = 0.27 | OR = 0.97<br>(0.73, 1.28)<br>P = 0.82           |
| <i>JAK2</i> <sup>V617F</sup> -<br>negative, N<br>(%) | 283<br>(34.2) | 217<br>(36.2)                                          | 58<br>(26.5)  | 8<br>(33.3)  | 275<br>(34.2) | 66<br>(27.2)  | <b>OR = 0.63<br/>(0.45-0.87)<br/>P = 0.006</b> | OR = 0.96<br>(0.40-2.27)<br>P=0.92    | 74/566<br>(13.1)             | OR = 0.78<br>(0.59, 1.03)<br>P = 0.08 | <b>OR = 0.68<br/>(0.48, 0.94)<br/>P = 0.021</b> |
| <i>CALR</i><br>mutation, N<br>(%)                    | 171<br>(20.7) | 130<br>(22.2)                                          | 36<br>(16.4)  | 5<br>(20.8)  | 166<br>(20.7) | 41<br>(16.9)  | OR =0.70<br>(0.48-1.04)<br>P = 0.08            | OR =1.00<br>(0.37-2.74)<br>P = 0.98   | 46/342<br>(13.4)             | OR = 0.80<br>(0.58, 1.13)<br>P = 0.21 | OR = 0.70<br>(0.47, 1.03)<br>P = 0.07           |
| <i>MPL</i><br>mutation, N<br>(%)                     | 44<br>(5.3)   | 35<br>(6.4)                                            | 9<br>(4.1)    | 0<br>(0)     | 44<br>(5.5)   | 9<br>(3.7)    | OR = 0.56<br>(0.26-1.19)<br>P = 0.13           | OR = 0.35<br>(0.02-5.82)<br>P = 0.43  | 9/88<br>(10.2)               | OR = 0.59<br>(0.29, 1.19)<br>P = 0.14 | OR = 0.51<br>(0.24, 1.06)<br>P = 0.07           |
| <i>Triple<br/>negative</i> , N<br>(%)                | 68<br>(8.2)   | 52<br>(9.5)                                            | 13<br>(5.9)   | 3<br>(12.5)  | 65<br>(8.1)   | 16<br>(6.6)   | OR = 0.67<br>(0.35, 1.20)<br>P = 0.18          | OR = 1.62<br>(0.47, 5.58)<br>P = 0.44 | 19/136<br>(14)               | OR = 0.84<br>(0.51, 1.39)<br>P = 0.50 | OR = 0.73<br>(0.42, 1.24)<br>P = 0.25           |

**Table S2.** Clinical and laboratory co-variates by *VEGFA* rs3025039 genotype in subjects with primary myelofibrosis (PMF).

|                                               | N                    | Genotype             |                      |                     |                      |                      | Comparison of genotype frequencies |                                             |
|-----------------------------------------------|----------------------|----------------------|----------------------|---------------------|----------------------|----------------------|------------------------------------|---------------------------------------------|
|                                               |                      | CC                   | CT                   | TT                  | CC /CT               | CT/TT                | CT/TT vs. CC.                      | TT vs. CC/CT                                |
|                                               | 849                  | 601                  | 224                  | 24                  | 825                  | 248                  |                                    |                                             |
| <b>Demographic co-variates</b>                |                      |                      |                      |                     |                      |                      |                                    |                                             |
| Age at diagnosis, (yrs, median (IQR))         | 52 (40-61)           | 52 (39-61)           | 52 (41-61)           | 51 (39-62)          | 52 (40-61)           | 52 (41-62)           | P = 0.45                           | P = 0.92                                    |
| Sex, males, N (% of the total PMF population) | 503 (59.2)           | 350 (58.2)           | 139 (62.0)           | 14 (58.3)           | 489 (97.2)           | 153 (61.7)           | OR =1.15 (0.85, 1.56)<br>P = 0.35  | OR =0.96 (0.42, 2.19)<br>P = 0.92           |
| <b>Laboratory co-variates</b>                 |                      |                      |                      |                     |                      |                      |                                    |                                             |
| Hemoglobin, g/L; median (IQR)                 | 131 (109-148)        | 131 (110-147)        | 130 (108-150)        | 119 (90.5-139)      | 131 (110-148)        | 130 (106-149)        | P = 0.73                           | P = 0.06                                    |
| WBC x10E+9/L; median (IQR)*                   | 8.5 ( 6.4-11.5)      | 8.4 ( 6.6-11)        | 8.7 ( 6.4-12)        | 8.5 ( 5-10)         | 8.5 ( 6.4-12)        | 8.7 ( 6.3-12)        | P = 0.96                           | P = 0.46                                    |
| Platelets x 10E+9/L; median (IQR)             | 467 (246-711)        | 479 (251-718)        | 459 (239-406)        | 281 (116-587)       | 474 (249-714)        | 450 (215-679)        | P = 0.26                           | <b>P = 0.023</b>                            |
| Platelets <150 x 10E+9/L (%)                  | 121/839 (14.4)       | 78/594 (13.1)        | 35/221 (15.8)        | 8/24 (33.3)         | 113/815 (13.8)       | 43/245 (17.5)        | OR = 1.40 (0.94, 2.11)<br>P = 0.09 | <b>OR = 3.10 (1.29, 7.42)<br/>P = 0.011</b> |
| Spleen index, cm x E+2; median (IQR)          | 120 (90-160)         | 120 (90-150)         | 120 (90-180)         | 125 (90-169)        | 120 (90-160)         | 120 (90-180)         | P = 0.12                           | P = 0.53                                    |
| Monocytes x 10E+9/L, N, median (IQR)          | 456<br>496 (334-688) | 335<br>499 (337-686) | 106<br>486 (319-713) | 15<br>483 (240-784) | 441<br>498 (336-688) | 121<br>483 (297-646) | P = 0.91                           | P = 0.84                                    |
| Serum lactate                                 | 469                  | 330                  | 127                  | 12                  | 457                  | 139                  | P = 0.07                           | <b>P = 0.044</b>                            |

|                                                      |                            |                            |                           |                          |                            |                           |                                                                   |                                                                   |
|------------------------------------------------------|----------------------------|----------------------------|---------------------------|--------------------------|----------------------------|---------------------------|-------------------------------------------------------------------|-------------------------------------------------------------------|
| dehydrogenase (LDH) level x ULN, N, median (IQR)     | 1.28<br>(0.92-1.94)        | 1.20<br>(0.87-1.94)        | 1.35<br>(1-1.07)          | 1.58<br>(1.35-2.51)      | 1.26<br>(0.91-1.94)        | 1.36<br>(1-1.97)          |                                                                   |                                                                   |
| LDH (ULN>1), N (%)                                   | 316<br>(67.4)              | 213<br>(64.5)              | 91<br>(71.6)              | 12<br>(100)              | 304<br>(66.5)              | 103<br>(74.1)             | OR = 1.57<br>(1.10, 2.44)<br><i>P</i> = 0.044                     | OR = 12.6<br>(0.74, 2.14)<br><i>P</i> = 0.076                     |
| <b>Biological co-variates</b>                        |                            |                            |                           |                          |                            |                           |                                                                   |                                                                   |
| CD34 positive cells in PB, x10E+6/L; N, median (IQR) | 401<br>10<br>(4-43)        | 285<br>8<br>(4-34)         | 100<br>11<br>(5-72)       | 16<br>18<br>(3-53)       | 385<br>9<br>(4-39)         | 119<br>12<br>(5-68)       | <i>P</i> = 0.12                                                   | <i>P</i> = 0.82                                                   |
| Serum cholesterol, mg/dL; N, median (IQR)            | 420<br>159<br>(129-183)    | 298<br>162<br>(133-185)    | 110<br>150<br>(127-180)   | 12<br>140<br>(118-166)   | 408<br>159<br>(130-184)    | 122<br>147<br>(124-180)   | <i>P</i> = 0.06                                                   | <i>P</i> = 0.14                                                   |
| NGS detected mutations N. (%)                        | 465/242<br>(19)            | 30/172<br>(17)             | 16/65<br>(25)             | 0/5<br>(0)               | 46/237<br>(19)             | 16/70<br>(23)             | OR = 1.44<br>(0.72, 2.86)<br><i>P</i> = 0.29                      | OR = 2.67<br>(0.14, 48.4)<br><i>P</i> = 0.51                      |
| Cytogenetic abnormalities N (%)                      | 86/290<br>(29.6)           | 56/203<br>(27.6)           | 25/77<br>(32.5)           | 5/10<br>(50)             | 81/280<br>(28.9)           | 30/87<br>(34.5)           | OR = 1.38<br>(0.80, 2.36)<br><i>P</i> = 0.24                      | OR = 2.45<br>(0.69, 8.7)<br><i>P</i> = 0.16                       |
| hs-CRP, ng/ml; N, median (IQR)                       | 237<br>0.15<br>(0.05-0.63) | 169<br>0.14<br>(0.05-0.57) | 59<br>0.19<br>(0.10-0.92) | 9<br>0.15<br>(0.06-0.55) | 228<br>0.15<br>(0.05-0.64) | 68<br>0.18<br>(0.10-0.80) | <i>P</i> = 0.07                                                   | <i>P</i> = 0.99                                                   |
| CD34/CXCR4 %, N, median (IQR)                        | 297<br>41<br>(21-63)       | 205<br>41<br>(21-64)       | 80<br>40<br>(20-53)       | 12<br>46<br>(25-64)      | 285<br>41<br>(21-63)       | 92<br>41<br>(20-54)       | <i>P</i> = 0.29                                                   | <i>P</i> = 0.82                                                   |
| BM fibrosis grade 0-1 N (%)                          | 484/846<br>(57.2)          | 355/598<br>(59.4)          | 120/224<br>(53.6)         | 9/24<br>(37.5)           | 475/822<br>(57.8)          | 129/248<br>(52)           | <b>OR = 0.74</b><br><b>(0.55, 0.99)</b><br><b><i>P</i> = 0.05</b> | <b>OR = 0.44</b><br><b>(0.18, 1.01)</b><br><b><i>P</i> = 0.05</b> |
| BM fibrosis grade 2-3 N (%)                          | 362/846<br>(42.8)          | 243/598<br>(40.6)          | 104/224<br>(46.4)         | 15/24<br>(62.5)          | 347/822<br>(42.2)          | 119/248<br>(48)           | <b>OR = 1.34</b><br><b>(1.00, 1.81)</b><br><b><i>P</i> = 0.05</b> | <b>OR = 2.28</b><br><b>(0.98, 5.27)</b><br><b><i>P</i> = 0.05</b> |

**Table S3.** Clinical and laboratory co-variates of PMF subjects with *JAK2*<sup>V617F</sup> and *VEGFA* rs3025039 genotype

|                                                          | N                          | Genotype                   |                           |                           |                            |                            | Comparison between genotypes                |                                             |
|----------------------------------------------------------|----------------------------|----------------------------|---------------------------|---------------------------|----------------------------|----------------------------|---------------------------------------------|---------------------------------------------|
|                                                          |                            | CC                         | CT                        | TT                        | CC /CT                     | CT/TT                      | CT/TT vs.CC                                 | TT vs. CC/CT                                |
| Number                                                   | 544                        | 367                        | 161                       | 16                        | 528                        | 177                        |                                             |                                             |
| Clinical and hematologic characteristics                 |                            |                            |                           |                           |                            |                            |                                             |                                             |
| Hemoglobin, g/L; median (IQR)                            | 13.7<br>(11.6-15.5)        | 13.8<br>(11.8-15.5)        | 13.6<br>(11.5-15.5)       | 13.4<br>(10.1-14.4)       | 13.7<br>(11.6-15.5)        | 13.5<br>(11.4-15.5)        | <i>P</i> = 0.36                             | <i>P</i> = 0.10                             |
| WBC, x 10 E+9/L; median (IQR)                            | 9.1<br>(6.7-12.2)          | 9.1<br>(6.8-12.4)          | 9.0<br>(6.7-12)           | 9.1<br>(5.4-11.6)         | 9.1<br>(6.8-12.2)          | 9.0<br>(6.7-12)            | <i>P</i> = 0.68                             | <i>P</i> = 0.74                             |
| Platelets x 10 E+9/L; median (IQR)                       | 450<br>(248-655)           | 473<br>(264-660)           | 416<br>(215-646)          | 281<br>(139-442)          | 455<br>(251-655)           | 394<br>(205-638)           | <i>P</i> = 0.09                             | <b><i>P</i> = 0.033</b>                     |
| Platelets < 150 x10E+9/L, N, (%)                         | 79/536<br>(14.7)           | 46/362<br>(12.7)           | 29/158<br>(18.3)          | 4/16<br>(25)              | 75/520<br>(14.4)           | 33/174<br>(18.9)           | OR =1.60<br>(0.98, 2.62)<br><i>P</i> = 0.06 | OR =1.97<br>(0.62, 6,29)<br><i>P</i> = 0.25 |
| Spleen index, cm x E+2; median (IQR)                     | 120<br>(90-176)            | 120<br>(90-170)            | 120<br>(90-180)           | 125<br>(115-169)          | 120<br>(90-176)            | 120<br>(90-180)            | <i>P</i> = 0.36                             | <i>P</i> = 0.64                             |
| Monocytes x10E+9/L, N, median (IQR)                      | 286<br>488<br>(328-688)    | 199<br>490<br>(337-688)    | 76<br>477<br>(297-679)    | 11<br>340<br>(240-822)    | 275<br>490<br>(335-688)    | 87<br>473<br>(279-688)     | <i>P</i> = 0.68                             | <i>P</i> = 0.45                             |
| Serum lactate dehydrogenase level x ULN, N, median (IQR) | 308<br>1.15<br>(0.88-1.75) | 207<br>1.14<br>(0.84-1.69) | 88<br>1.19<br>(0.95-1.76) | 13<br>1.79<br>(1.40-3.20) | 295<br>1.14<br>(0.87-1.73) | 101<br>1.29<br>(0.98-1.81) | <i>P</i> = 0.08                             | <b><i>P</i> = 0.005</b>                     |
| Biological characteristics                               |                            |                            |                           |                           |                            |                            |                                             |                                             |
| Blood CD34-positive cells, x10E+6/L; N, median (IQR)     | 259<br>7.5<br>(3.7-160)    | 180<br>6.3<br>(3.6-175)    | 69<br>9.4<br>(3.9-33)     | 10<br>28.5<br>(18-47)     | 249<br>7.1<br>(3.7-26.5)   | 79<br>11.1<br>(4.4-45)     | <i>P</i> = 0.07                             | <b><i>P</i> = 0.027</b>                     |
| Serum cholesterol,                                       | 267                        | 182                        | 77                        | 8                         | 259                        | 85                         | <b><i>P</i> = 0.046</b>                     | <i>P</i> = 0.24                             |

| mg/dL; N, median (IQR)             | 156<br>(129-179)           | 160<br>(133-180)           | 146<br>(124-178)          | 147<br>(118-151)         | 157<br>(129-180)           | 146<br>(122-176)          |                                              |                                              |
|------------------------------------|----------------------------|----------------------------|---------------------------|--------------------------|----------------------------|---------------------------|----------------------------------------------|----------------------------------------------|
| NGS mutations<br>N. (%)            | 20/148<br>(13.5)           | 12/101<br>(11.9)           | 8/45<br>(17.8)            | 0/2<br>(0)               | 20/146<br>(13.7)           | 8/47<br>17.0              | OR = 1.52<br>0.57, 4.01<br><i>P</i> = 0.39   | 1.23<br>(0.58, 26.41)<br><i>P</i> = 0.89     |
| Cytogenetic<br>abnormalities N (%) | 61/190<br>(32.1)           | 36/126<br>(28.6)           | 20/56<br>(37.5)           | 5/8<br>(62.5)            | 56/182<br>(30.8)           | 25/64<br>(39)             | OR = 1.60<br>(0.85, 3.02<br><i>P</i> = 0.14  | OR = 3.75<br>(0.86, 16.23<br><i>P</i> = 0.08 |
| hs-CRP, ng/ml; N,<br>median (IQR)  | 150<br>0.14<br>(0.06-0.57) | 106<br>0.12<br>(0.05-0.56) | 39<br>0.34<br>(0.11-0.92) | 5<br>0.15<br>(0.10-0.31) | 145<br>0.14<br>(0.06-0.57) | 44<br>0.31<br>(0.10-0.87) | <b><i>P</i> = 0.018</b>                      | <i>P</i> = 0.83                              |
| CD34/CXCR4 %, N,<br>median (IQR)   | 188<br>43<br>(23-63)       | 125<br>42<br>(24-65)       | 55<br>41<br>(20-54)       | 8<br>45<br>(16-57)       | 180<br>42<br>(23-63)       | 63<br>43<br>(19-54)       | <i>P</i> = 0.44                              | <i>P</i> = 0.63                              |
| BM fibrosis grade, 0-1; N<br>(%)   | 335/542<br>(61.8)          | 234/365<br>(64.1)          | 94/161<br>(58.4)          | 7/16<br>(43.7)           | 328/526<br>(62.3)          | 101/177<br>(57.1)         | OR = 0.74<br>(0.51, 1.07)<br><i>P</i> = 0.11 | OR = 0.47<br>(0.17, 1.28)<br><i>P</i> = 0.14 |

IQR = interquartile range; PMF = primary myelofibrosis; NGS = next generation sequencing; CRP = C-reactive protein

**Table S4.** Clinical and laboratory co-variates of PMF subjects without *JAK2*<sup>V617F</sup> and *VEGFA* rs3025039 genotype.

|                                                          | Number                   | Genotype                |                           |                          |                           |                           | Comparison between genotypes |                 |
|----------------------------------------------------------|--------------------------|-------------------------|---------------------------|--------------------------|---------------------------|---------------------------|------------------------------|-----------------|
|                                                          |                          | CC                      | CT                        | TT                       | CC /CT                    | CT/TT                     | CT/TT vs. CC                 | TT vs. CC/CT    |
|                                                          | 283                      | 217                     | 58                        | 8                        | 275                       | 66                        |                              |                 |
| Clinical and hematologic characteristics                 |                          |                         |                           |                          |                           |                           |                              |                 |
| Hemoglobin, g/L; median (IQR)                            | 121<br>(102-136)         | 123<br>(104-136)        | 120<br>(99-137)           | 100<br>(89-126)          | 122<br>(104-136)          | 118<br>(98-135)           | <i>P</i> = 0.42              | <i>P</i> = 0.18 |
| White-blood cell count, x 10E+9/L; median (IQR)          | 7.7<br>(6.0-9.9)         | 7.7<br>(6-9.9)          | 7.3<br>(6.0-10.4)         | 6.5<br>(4.2-9.0)         | 7.7<br>(6.0-9.9)          | 7.3<br>(5.7-10.1)         | <i>P</i> = 0.82              | <i>P</i> = 0.30 |
| Platelet count, x 10E+9/L; median (IQR)                  | 510<br>(245-775)         | 490<br>(235-775)        | 597<br>(320-822)          | 409<br>(101-724)         | 513<br>(245-776)          | 588<br>(291-763)          | <i>P</i> = 0.42              | <i>P</i> = 0.31 |
| Spleen index, cm x E+2; median (IQR)                     | 110<br>(90-140)          | 100<br>(90-135)         | 113<br>(90-150)           | 110<br>(90-170)          | 110<br>(90-140)           | 113<br>(90-150)           | <i>P</i> = 0.36              | <i>P</i> = 0.87 |
| Monocyte count, x10E+9/L, N, median (IQR)                | 162<br>507<br>(336-702)  | 127<br>504<br>(336-679) | 29<br>520<br>(330-891)    | 6<br>595<br>(395-784)    | 156<br>506<br>(334-693)   | 35<br>531<br>(330-891)    | <i>P</i> = 0.39              | <i>P</i> = 0.46 |
| Serum lactate dehydrogenase level x ULN, N, median (IQR) | 157<br>1.58<br>(1.1-2.3) | 117<br>1.54<br>(1-2.27) | 36<br>1.78<br>(1.34-2.36) | 4<br>1.46<br>(1.31-2.75) | 153<br>1.61<br>(1.06-2.3) | 40<br>1.68<br>(1.34-2.36) | <i>P</i> = 0.19              | <i>P</i> = 0.74 |
| Biological characteristics                               |                          |                         |                           |                          |                           |                           |                              |                 |
| Blood CD34-positive cells, x 10 E+6/L; median (IQR)      | 133<br>19<br>(6-68)      | 98<br>18<br>(6-60)      | 28<br>52<br>(8-80)        | 7<br>3<br>(2-46)         | 126<br>21<br>(6-72)       | 35<br>38<br>(5-77)        | <i>P</i> = 0.37              | <i>P</i> = 0.06 |
| Serum cholesterol, mg/dL; N, median (IQR)                | 147<br>163<br>(131-192)  | 109<br>163<br>(135-193) | 33<br>166<br>(131-183)    | 5<br>135<br>(123-181)    | 142<br>163<br>(133-192)   | 38<br>163<br>(128-183)    | <i>P</i> = 0.62              | <i>P</i> = 0.38 |

|                                   |                          |                           |                           |                          |                           |                           |                                         |                                        |
|-----------------------------------|--------------------------|---------------------------|---------------------------|--------------------------|---------------------------|---------------------------|-----------------------------------------|----------------------------------------|
| hs-CRP, ng/ml; N,<br>median (IQR) | 82<br>0.17<br>(0.04-0.7) | 59<br>0.02<br>(0.05-1.79) | 19<br>0.18<br>(0.04-0.74) | 4<br>0.30<br>(0.04-0.63) | 78<br>0.17<br>(0.04-0.70) | 23<br>0.18<br>(0.04-0.72) | $P = 0.79$                              | $P = 0.92$                             |
| CD34/CXCR4 %, N,<br>median (IQR)  | 104<br>40<br>(18-63)     | 75<br>40<br>(18-66)       | 24<br>31<br>(19-49)       | 5<br>48<br>(41-67)       | 99<br>37<br>(18-63)       | 29<br>41<br>(21-50)       | $P = 0.70$                              | $P = 0.29$                             |
| BM fibrosis grade, 0-1; N<br>(%)  | 137/282<br>(48.6)        | 112/216<br>(51.8)         | 23/58<br>(39.6)           | 2/8<br>(25)              | 135/274<br>(49.3)         | 25/66<br>(37.9)           | OR = 0.56<br>(0.32-0.99)<br>$P = 0.048$ | OR = 0.34<br>(0.07-1.73)<br>$P = 0.19$ |

IQR = interquartile range; PMF = primary myelofibrosis; NGS = next generation sequencing; CRP = C-reactive protein

**Table S5.** Hazard ratio (HR) of the outcomes of PMF subjects with *JAK2*<sup>V617F</sup> and *VEGFA* rs3025039 genotypes.

|                                            | CT/TT (N=177) vs. CC (N=367) |             | TT (N=16) vs. CC/CT (N=528) |              |
|--------------------------------------------|------------------------------|-------------|-----------------------------|--------------|
|                                            | HR (95% CI)                  | P-value     | HR (95% CI)                 | P-value      |
| Hemoglobin less than 100 g/L               | 1.19 (0.91, 1.59)            | 0.22        | 1.49 (0.73, 3.03)           | 0.27         |
| Spleen > 10 cm from the left costal margin | 1.31 (1.01,1.72)             | <b>0.05</b> | 1.01 (0.45, 2.27)           | 0.98         |
| WBC > 12 x 10E+9/L                         | 1.05 (0.81, 1.37)            | 0.73        | 1.04 (0.49, 2.22)           | 0.90         |
| WBC < 4 x 10E+9/L                          | 1.30 (0.79, 2.13)            | 0.31        | 1.83 (0.25, 13.2)           | 0.54         |
| Platelets < 150 x 10E+9/L                  | 1.25 (0.91, 1.72)            | 0.17        | 2.56 (1.35, 5)              | <b>0.004</b> |
| Blood CD34-positive cells >100 x 10E+6/L   | 1.31 (0.93, 1.85)            | 0.12        | 1.72 (0.69, 4.16)           | 0.24         |
| Transplant                                 | 1.78 (0.98, 3.22)            | 0.06        | 1.75 (0.42, 7.14)           | 0.44         |
| Blast transformation                       | 1.09 (0.68, 1.75)            | 0.72        | 2 (0.72, 5.55)              | 0.18         |
| Death                                      | 0.30 (0.92, 1.82)            | 0.14        | 2.13 (1.03, 4.35)           | <b>0.04</b>  |
